# Supplementary material
Source: publisher figshare collection journal article supplement (https://asha.figshare.com/articles/dataset/_/11356487)
Supplement: Supplementary file 1 [file 1]

**Supplemental Material S1.** Reverberation times for each classroom condition.

| <b>RT</b> | <b>Frequency (Hz)</b> |            |            |             |             |             | <b>Ave.</b> |
|-----------|-----------------------|------------|------------|-------------|-------------|-------------|-------------|
|           | <b>160</b>            | <b>250</b> | <b>500</b> | <b>1000</b> | <b>2000</b> | <b>4000</b> |             |
| 0.3       | 0.59                  | 0.46       | 0.26       | 0.34        | 0.41        | 0.43        | 0.33        |
| 0.6       | 0.82                  | 0.74       | 0.57       | 0.59        | 0.62        | 0.59        | 0.59        |
| 0.9       | 0.85                  | 0.93       | 0.90       | 0.96        | 0.90        | 0.70        | 0.92        |

*Note.* RT = reverberation time (s); Ave. = average RT for 500, 1000, and 2000 Hz.
