# Supplementary material
Source: publisher figshare collection journal article supplement (https://asha.figshare.com/articles/dataset/_/11356487)
Supplement: Supplementary file 2 [file 1]

**Supplemental Material S2.** Speech perception scores (% correct) for each listening condition.

|                           | <b>SNR</b>      |                  |                  |                  |                   |                   |                   |
|---------------------------|-----------------|------------------|------------------|------------------|-------------------|-------------------|-------------------|
|                           | <b><u>0</u></b> | <b><u>+3</u></b> | <b><u>+6</u></b> | <b><u>+9</u></b> | <b><u>+12</u></b> | <b><u>+15</u></b> | <b><u>+18</u></b> |
| <b><u>0.3 s RT</u></b>    |                 |                  |                  |                  |                   |                   |                   |
| <i>M</i>                  | 18.9            | 39.4             | 70.8             | 82.8             | 91.4              | 93.0              | 91.5              |
| <i>SD</i>                 | 14.9            | 21.4             | 14.4             | 13.2             | 7.9               | 7.1               | 8.5               |
| <b><u>0.6 s RT</u></b>    |                 |                  |                  |                  |                   |                   |                   |
| <i>M</i>                  | 15.8            | 40.3             | 61.4             | 72.2             | 76.4              | 88.0              | 93.4              |
| <i>SD</i>                 | 17.6            | 19.0             | 18.3             | 14.3             | 17.3              | 8.7               | 8.0               |
| <i>N</i>                  | 10              | 10               | 10               | 10               | 10                | 10                | 8                 |
| <b><u>0.9 s RT</u></b>    |                 |                  |                  |                  |                   |                   |                   |
| <i>M</i>                  | 12.3            | 30.6             | 50.8             | 65.0             | 73.6              | 80.0              | 80.4              |
| <i>SD</i>                 | 12.8            | 27.2             | 23.4             | 19.6             | 17.8              | 16.3              | 14.3              |
| <i>N</i>                  | 10              | 10               | 10               | 10               | 10                | 10                | 8                 |
| <b><u>Sound Booth</u></b> |                 |                  |                  |                  |                   |                   |                   |
| <i>M</i>                  | 45.8            | 70.8             | 78.9             | 90.8             | 94.7              | 96.1              | 97.3              |
| <i>SD</i>                 | 21.3            | 19.7             | 11.4             | 6.9              | 6.2               | 7.0               | 3.6               |
| <i>N</i>                  | 10              | 10               | 10               | 10               | 10                | 10                | 7                 |

*Note.* SNR = speech-to-noise ratio (dBA); RT = reverberation time (s); *M* = mean speech perception score as percent correct; *SD* = standard deviation; *N* = number of participants, which varied as a result of adjustments in the 21-dB range of test SNRs to each participant's ability to perceive speech in reverberation and noise.
